# Supplementary material for: Investigation of the mechanisms of VEGF-mediated compensatory lung growth: the role of the VEGF heparin-binding domain
Source: PubMed Central journal article supplement (PMC8178332; doi:10.1038/s41598-021-91127-0), 2021-06-04

**Investigation of the mechanisms of VEGF-mediated compensatory lung growth: The role of the VEGF heparin-binding domain**

Lumeng J. Yu<sup>1,2</sup>, Victoria H. Ko<sup>1,2</sup>, Duy T. Dao<sup>1,2</sup>, Jordan D. Secor<sup>1,2</sup>, Amy Pan<sup>1,2</sup>, Bennet S. Cho<sup>1,2</sup>, Paul D. Mitchell<sup>3</sup>, Hiroko Kishikawa<sup>1,2</sup>, Diane R. Bielenberg<sup>1</sup>, Mark Puder<sup>1,2\*</sup>

<sup>1</sup> Vascular Biology Program, Boston Children's Hospital, Harvard Medical School, Boston, MA 02115, USA

<sup>2</sup> Department of Surgery, Boston Children's Hospital, Harvard Medical School, 300 Longwood Ave, Fegan 3, Boston, MA 02115, USA

<sup>3</sup> Institutional Centers for Clinical and Translational Research, Boston Children's Hospital, Boston, MA 02115, USA

\*Correspondence to: [mark.puder@childrens.harvard.edu](mailto:mark.puder@childrens.harvard.edu)

**Supplementary Information File 1**  
(Corresponds to Figure 4A)

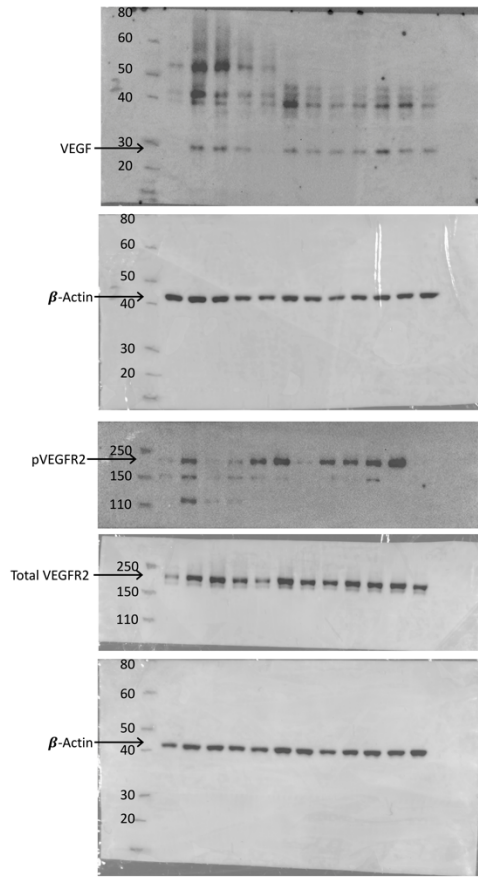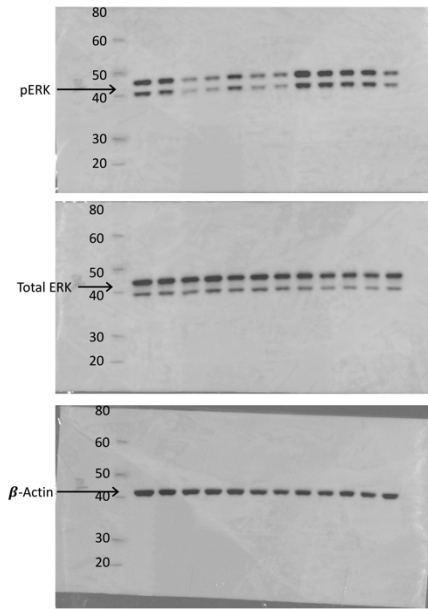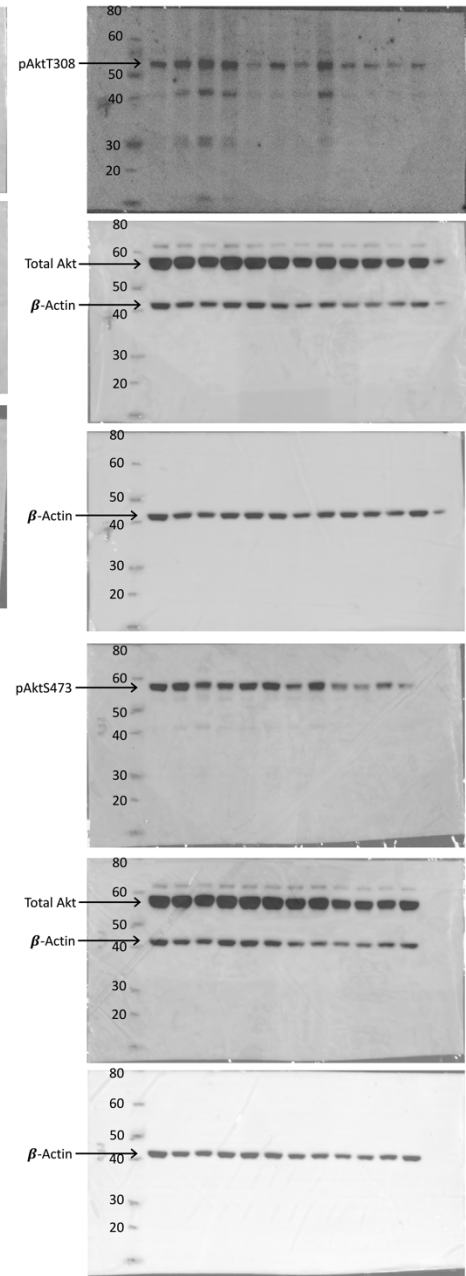

**Supplementary Information File 2**  
(Corresponds to Figure 4C)

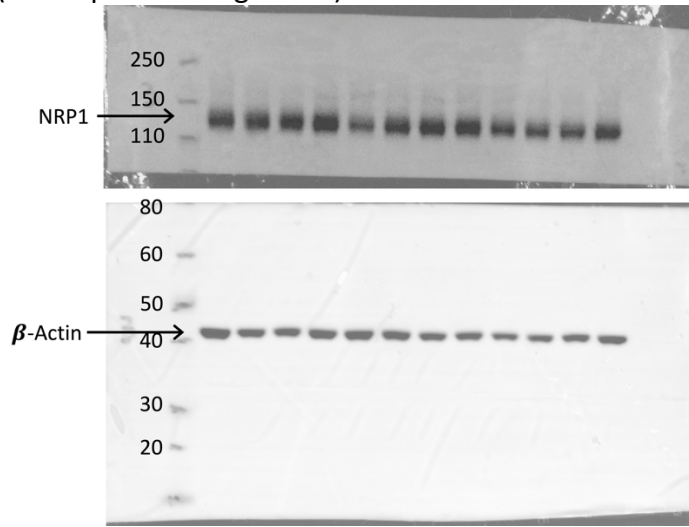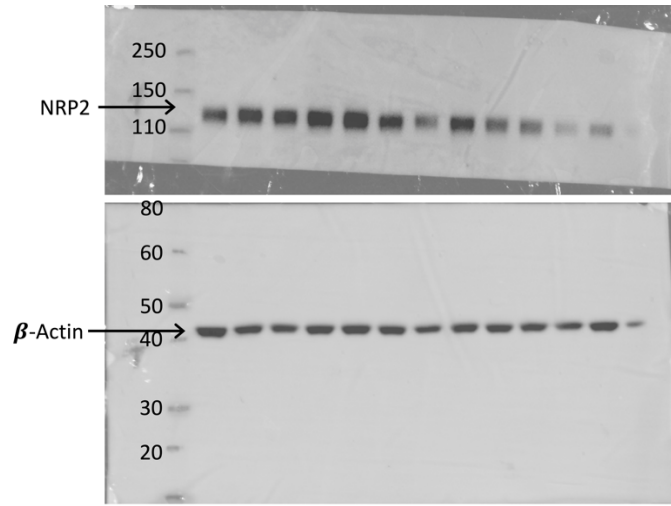

**Supplementary Information File 3**  
(Corresponds to Figure 4E)

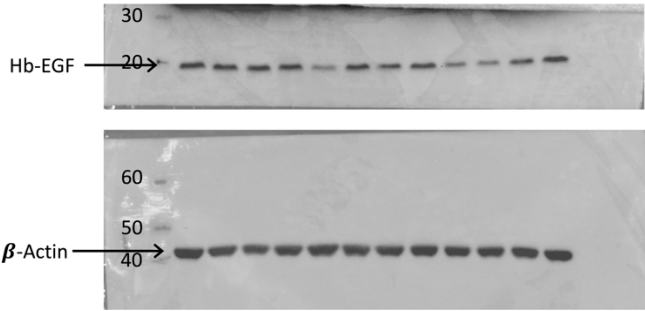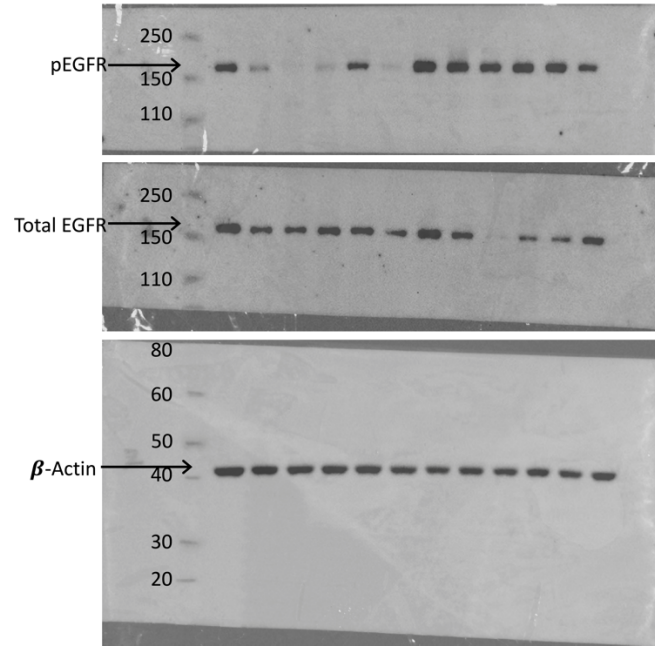

### Supplementary Information File 4

(A, B Corresponds to Figure 6A)(C, D Corresponds to Figure 6C)

**A, C** – 3 minute exposure

**B, D** – 30 second Exposure

**E** – Blot D was stripped and reprobred with total VEGFR2 primary antibody to demonstrate pattern near-identical to total VEGFR2 blot performed simultaneously using the same lysate on a different gel. As identical technique was performed by the same operator for all blots in Figure 6/Supplementary Information File 4, no additional stripping/reprobing experiments were performed to verify total VEGFR2 results.

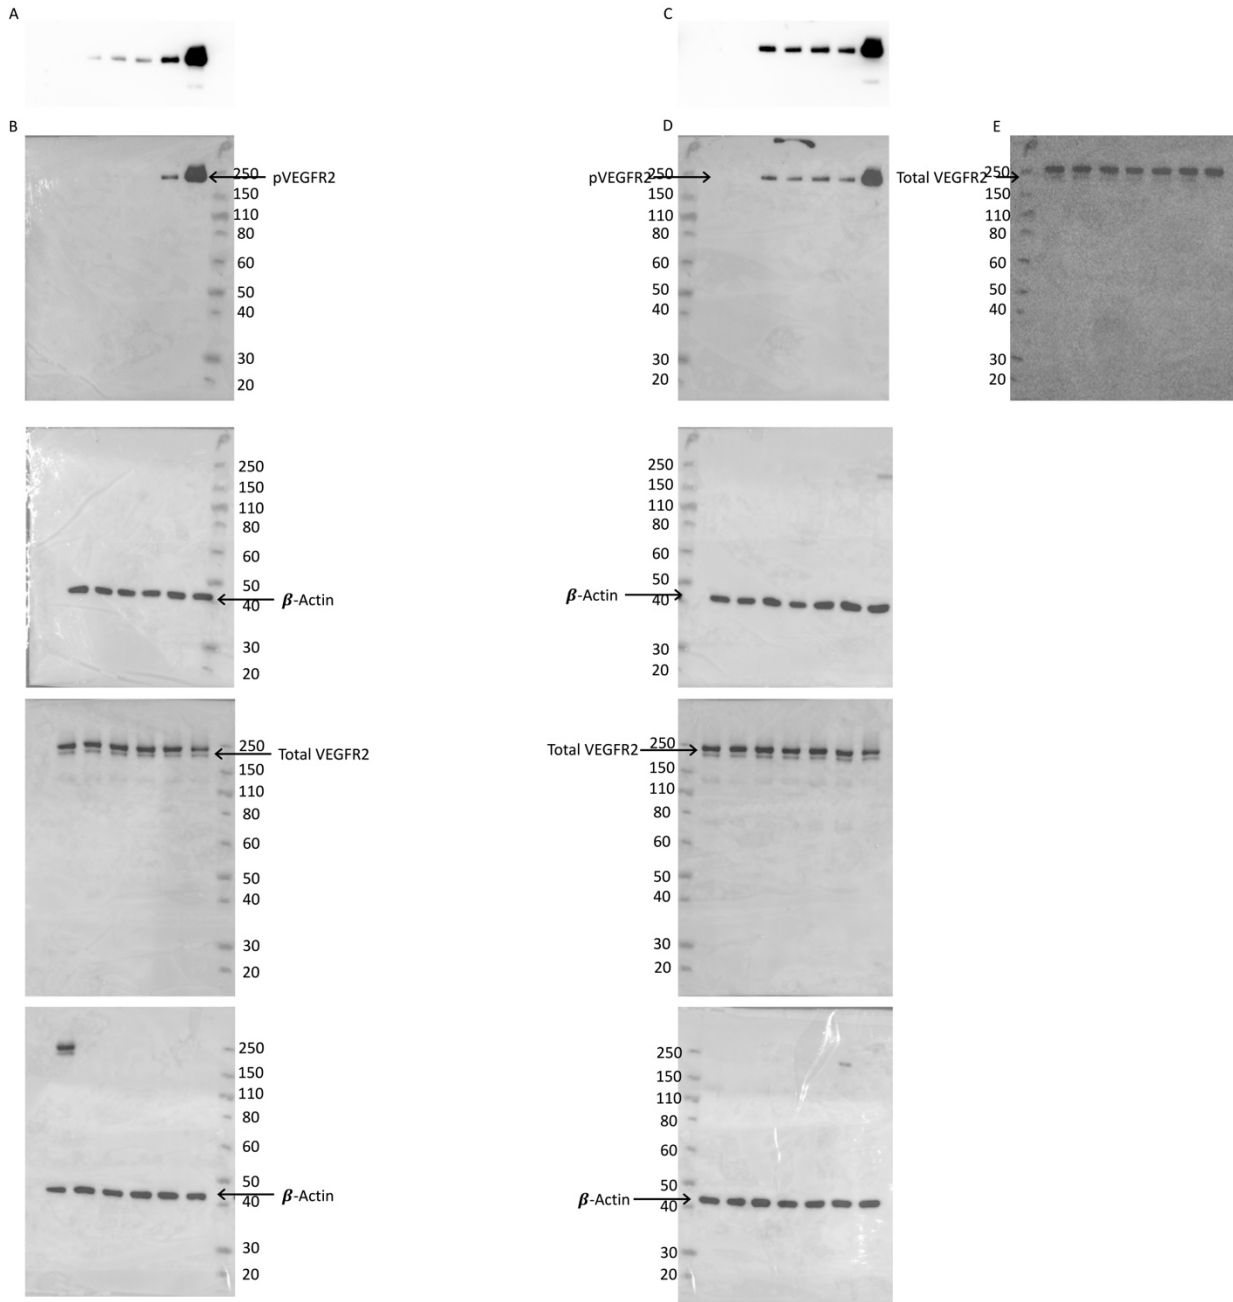

**Supplementary Information File 5**

(Corresponds to Supplemental Figure 4A (left side of marker), C (right side of marker))

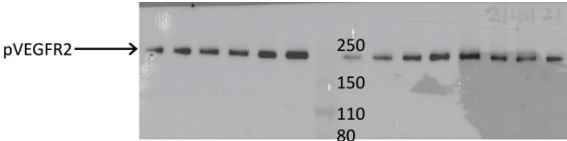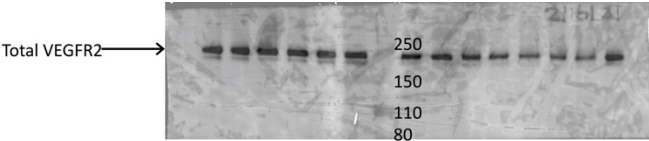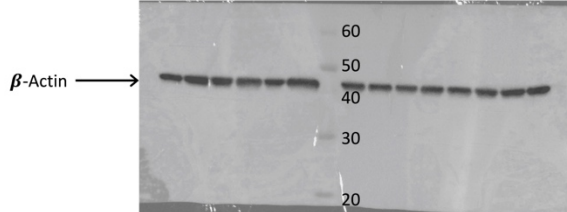

**Supplementary Information File 6**  
(Corresponds to Supplemental Figure 5A)

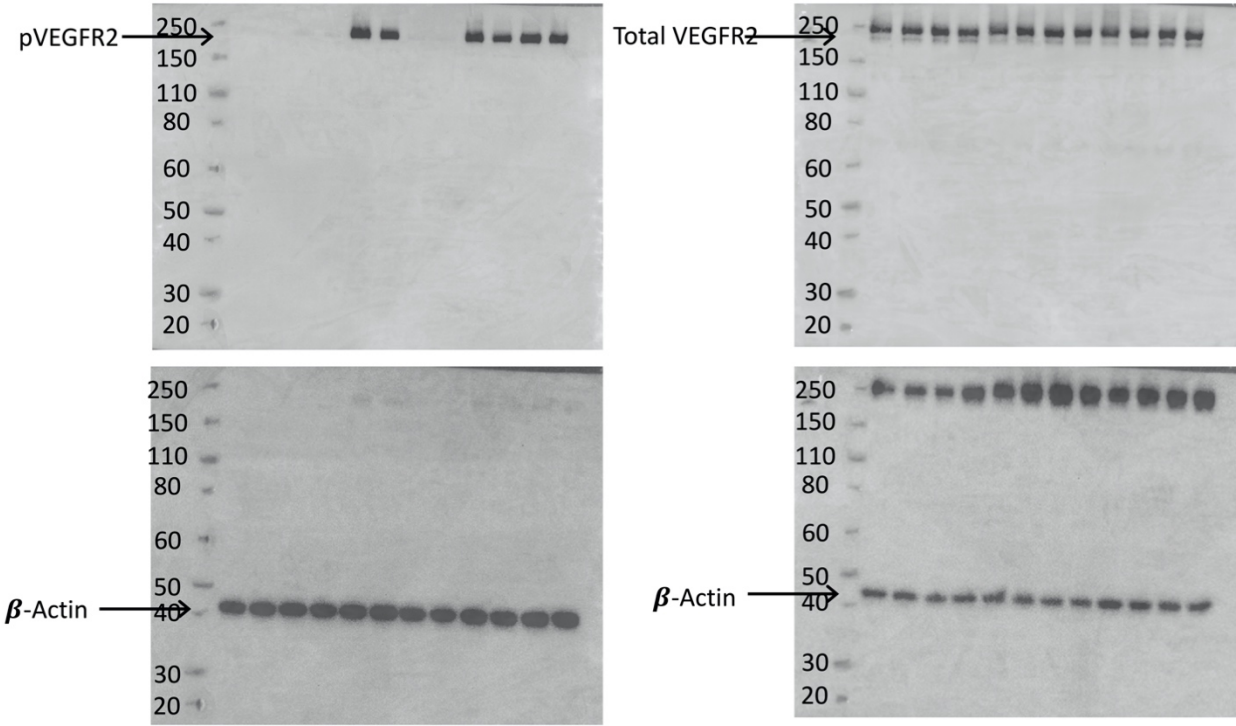

Supplement: 41598_2021_91127_MOESM1_ESM.pdf [file 41598_2021_91127_MOESM1_ESM.pdf]
